# Supplementary material
Source: publisher figshare collection journal article supplement (https://karger.figshare.com/ndownloader/files/8717452)
Supplement: Supplementary file 1 [file 8717452]

## **Editor's Note**

---

The editorial staff wishes to state that when reviewing the following two papers in this issue [Audiol Neurotol 2016;21:12–21 and 2016;21:22–29], the two editors Dr. Harris and Dr. Ryan, who have an equity interest in Otonomy Inc., had no involvement in the review process in order to prevent any conflict of interest.
